# Supplementary material
Source: Springer Nature journal article supplement (https://www.springermedizin.de/resource/supplementary/12245_2011_33_MOESM1_ESM.pdf/9672634)

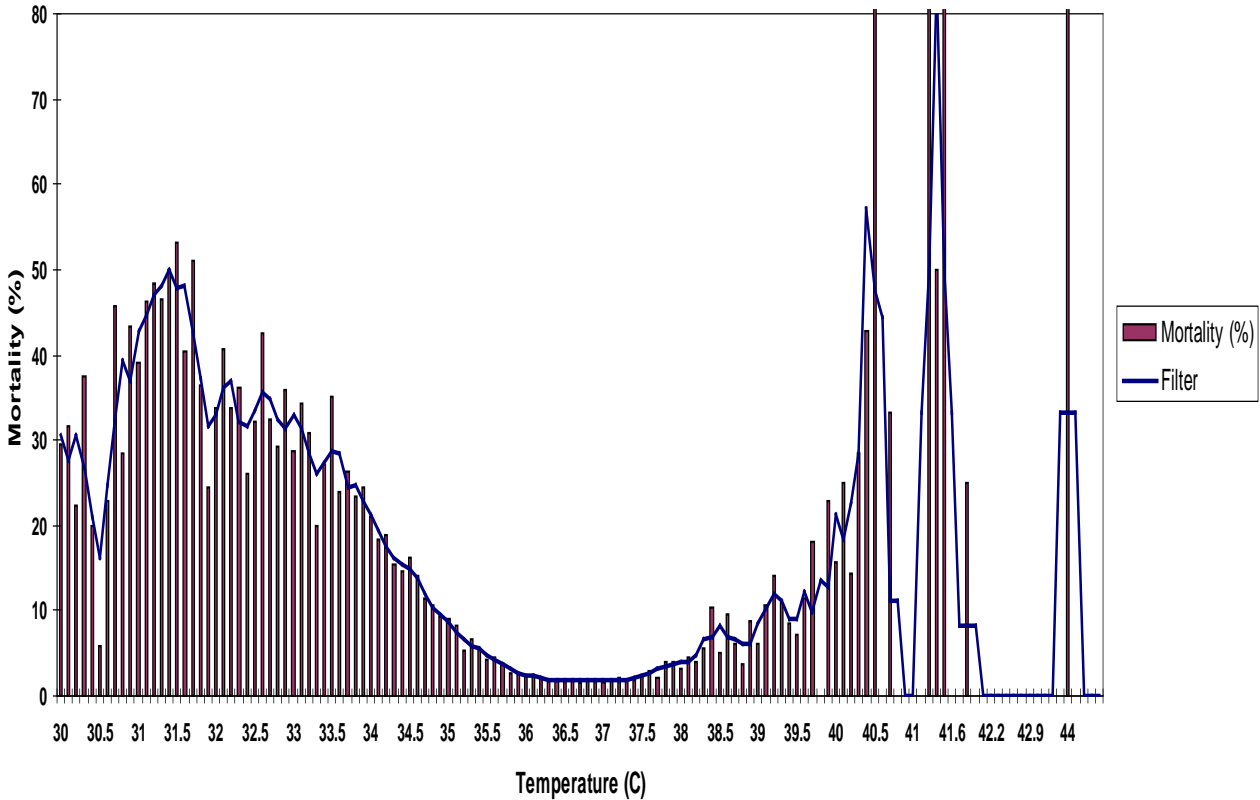

Supplement: MOESM1 [file 9672634]
